# Supplementary material
Source: PubMed Central journal article supplement (PMC6646283)
Supplement: ao8b01404_si_001.pdf [file ao8b01404_si_001.pdf]

## Binding analysis of the Inositol-requiring enzyme 1 (IRE1) kinase domain

Antonio Carlesso<sup>1</sup>, Chetan Chintha<sup>2</sup>, Adrienne M. Gorman<sup>2</sup>, Afshin Samali<sup>2</sup> and Leif A. Eriksson<sup>1\*</sup>

<sup>1</sup>Department of Chemistry and Molecular Biology, University of Gothenburg, 405 30 Göteborg, Sweden

<sup>2</sup>Apoptosis Research Centre, National University of Ireland Galway, Galway, Ireland.

\*Correspondence

Leif Eriksson, Department of Chemistry and Molecular Biology,

University of Gothenburg, 405 30 Göteborg, Sweden.

Email: leif.eriksson@chem.gu.se

### SUPPLEMENTARY INFORMATION

|                                                                                                                                                                                                                                                                                                                                                                                                                                     | Page  |
|-------------------------------------------------------------------------------------------------------------------------------------------------------------------------------------------------------------------------------------------------------------------------------------------------------------------------------------------------------------------------------------------------------------------------------------|-------|
| <b>Table S1.</b> Series of KIRAs (1–25) <sup>1</sup> . IRE1 kinase and RNase activity shown in half maximum inhibitory concentration (IC50) values (mean ± SEM, n = 3) <sup>1</sup> .                                                                                                                                                                                                                                               | S3-7  |
| <b>Figure S1.</b> Sequence alignment of IRE1 cytosolic domain in different organism; yeast structure (PDB code: 3LJ1), murine (PDB code: 4PL3), and human (PDB code: 4U6R) using Bioluminate <sup>2</sup> in Schrödinger <sup>3</sup> . Identical residues are matched by same colour. Identical residues in the kinase active site, within a distance of 5.0 Å from the co-crystallized ligands, are highlighted using blue boxes. | S8    |
| <b>Figure S2.</b> A multiple sequence alignment of IRE1 cytosolic domain in 8 different organism using Clustal <sup>4</sup> . Residues are coloured as follows: AVFPMILW are shown in red, DE are blue, RHK are magenta, STYHCNGQ are green.                                                                                                                                                                                        | S9-10 |
| <b>Figure S3.</b> Superposition of the 3D structures of IRE1 in different organism; yeast structure in orange (PDB code: 2RIO), murine in yellow (PDB code: 4PL3), and human in red (PDB code: 5HGI).                                                                                                                                                                                                                               | S11   |
| <b>Figure S4.</b> Root-mean-square deviation (RMSD) matrix values, in Å, of the position of the C $\alpha$ atoms for each pair of IRE1 cytosolic domain structures. The RMSD values are represented by a colorimetric scale, going from blue (0) to red (4.0).                                                                                                                                                                      | S12   |

**Figure S5.** Root-mean-square deviation (RMSD) matrix values, in Å, of the positions of the C $\alpha$  atoms for each pair of IRE1 kinase active site domain structures. The RMSD values are represented by a colorimetric scale, going from blue (0) to red (4.0). S13

**Figure S6.** Per amino-acid interaction energy map for co-crystallized compounds inside the yeast IRE1 kinase binding site. 2RIO, 3LJ0: Endogenous ligands (ADP) co-crystallized; 3FBV, 3LJ2, 3LJ1 and 3SDJ: Exogenous ligands co-crystallized; (A) Electrostatic energy values (kcal mol<sup>-1</sup>). (B) Hydrophobic score (arbitrary units). S14

**Figure S7.** Per amino-acid interaction energy map for co-crystallized compounds inside the murine IRE1 kinase binding site. A, B: Endogenous ligands (ADP). (A) Electrostatic energy values (kcal mol<sup>-1</sup>). (B) Hydrophobic score (arbitrary units). S15

**Figure S8.** Schematic representation of the ligand interactions of (A) KIRA (PDB code: 4U6R) and (B) ADP (endogenous ligand) (PDB code: 3P23). S16

**Figure S9.** Superposition of all available 3D structures of IRE1 in different organism. Co-crystallized ligands are highlighted through stick representation: (A) Ligand co-crystallized in 4YZ9 PDB structure is coloured green, (B) Ligand co-crystallized in 4U6R PDB structure is coloured green. S17

**Figure S10.** The Docking Score values returned by each co-crystallized ligand (y-values) for each IRE1 PDB structure (x-values) are represented by a colorimetric scale, going from red (-15) to yellow (0) indicative of Docking score value. Co-crystallized ligands highlighted with boxes for each IRE1 structure. S18

**Figure S11.** The Docking Score of each KIRA analogues (y-values1-25) for each IRE1 PDB structures (x-values) are represented by a colorimetric scale, going from red (-15) to yellow (0) indicative of Docking score value. \*KIRA co-crystallized in 4U6R PDB structure. S19

**Table S1.** Series of KIRA analogs (1–25)<sup>1</sup>. IRE1 kinase and RNase activity shown in half maximum inhibitory concentration (IC<sub>50</sub>) values (mean ± SEM, n = 3)<sup>1</sup>.

| Structure | BindingDB Ligand Name  | Kinase IC <sub>50</sub><br>(μm) | RNase IC <sub>50</sub><br>(μm) | Reference    |
|-----------|------------------------|---------------------------------|--------------------------------|--------------|
|           | <b>Kira analogue 1</b> | <b>1.3 ± 0.1</b>                | <b>1.8 ± 0.1</b>               | <sup>1</sup> |
|           | <b>Kira analogue 2</b> | <b>1.7 ± 0.02</b>               | <b>0.12 ± 0.01</b>             | <sup>1</sup> |
|           | <b>Kira analogue 3</b> | <b>0.14 ± 0.01</b>              | <b>0.090 ± 0.01</b>            | <sup>1</sup> |
|           | <b>Kira analogue 4</b> | <b>0.51 ± 0.04</b>              | <b>0.18 ± 0.04</b>             | <sup>1</sup> |
|           | <b>Kira analogue 5</b> | <b>0.26 ± 0.01</b>              | <b>0.48 ± 0.02</b>             | <sup>1</sup> |

|                                                                                     |                         |                    |                    |              |
|-------------------------------------------------------------------------------------|-------------------------|--------------------|--------------------|--------------|
| 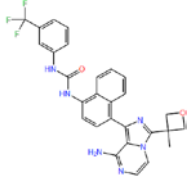   | <b>Kira analogue 6</b>  | <b>0.68 ± 0.06</b> | <b>0.33 ± 0.01</b> | <sup>1</sup> |
|    | <b>Kira analogue 7</b>  | <b>0.85 ± 0.05</b> | <b>0.39 ± 0.01</b> | <sup>1</sup> |
|    | <b>Kira analogue 8</b>  | <b>2.7 ± 0.5</b>   | <b>1.5 ± 0.1</b>   | <sup>1</sup> |
|  | <b>Kira analogue 9</b>  | <b>3.0 ± 0.2</b>   | <b>2.4 ± 0.1</b>   | <sup>1</sup> |
|  | <b>Kira analogue 10</b> | <b>3.9 ± 0.2</b>   | <b>1.2 ± 0.1</b>   | <sup>1</sup> |

|                                                                                     |                         |                    |                    |              |
|-------------------------------------------------------------------------------------|-------------------------|--------------------|--------------------|--------------|
| 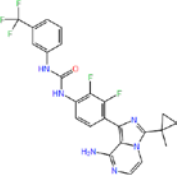   | <b>Kira analogue 11</b> | <b>17 ± 1</b>      | <b>20 ± 5</b>      | <sup>1</sup> |
|    | <b>Kira analogue 12</b> | <b>0.43 ± 0.07</b> | <b>0.19 ± 0.01</b> | <sup>1</sup> |
|    | <b>Kira analogue 13</b> | <b>0.11 ± 0.01</b> | <b>0.22 ± 0.01</b> | <sup>1</sup> |
|  | <b>Kira analogue 14</b> | <b>0.27 ± 0.03</b> | <b>0.26 ± 0.01</b> | <sup>1</sup> |
|  | <b>Kira analogue 15</b> | <b>0.33 ± 0.08</b> | <b>0.31 ± 0.01</b> | <sup>1</sup> |

|                                                                                     |                         |                    |                   |              |
|-------------------------------------------------------------------------------------|-------------------------|--------------------|-------------------|--------------|
| 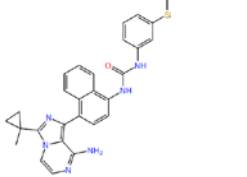   | <b>Kira analogue 16</b> | <b>0.32 ±0.02</b>  | <b>0.14 ±0.01</b> | <sup>1</sup> |
|    | <b>Kira analogue 17</b> | <b>0.66 ±0.08</b>  | <b>0.29 ±0.07</b> | <sup>1</sup> |
|    | <b>Kira analogue 18</b> | <b>0.94 ± 0.06</b> | <b>0.61 ±0.07</b> | <sup>1</sup> |
|  | <b>Kira analogue 19</b> | <b>2.3 ± 0.7</b>   | <b>1.6 ±0.1</b>   | <sup>1</sup> |
|  | <b>Kira analogue 20</b> | <b>0.42 ± 0.14</b> | <b>0.19 ±0.05</b> | <sup>1</sup> |

|                                                                                     |                                                                    |                    |                   |              |
|-------------------------------------------------------------------------------------|--------------------------------------------------------------------|--------------------|-------------------|--------------|
| 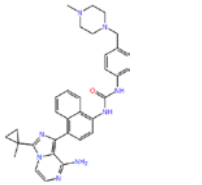   | <b>Kira analogue 21</b>                                            | <b>0.17 ± 0.07</b> | <b>0.34 ±0.02</b> | <sup>1</sup> |
|    | <b>Kira analogue 22</b>                                            | <b>17 ± 5</b>      | <b>7.1 ±3.0</b>   | <sup>1</sup> |
|    | <b>Kira analogue 23</b>                                            | <b>3.8 ± 0.8</b>   | <b>3.8 ±0.8</b>   | <sup>1</sup> |
|  | <b>Kira analogue 24</b>                                            | <b>13 ± 1.7</b>    | <b>13 ±1.7</b>    | <sup>1</sup> |
|  | <b>Kira analogue 25</b>                                            | <b>2.7 ± 0.4</b>   | <b>2.7 ±0.4</b>   | <sup>1</sup> |
|  | <b>KIRA analogue<br/>co-crystallized in 4U6R<br/>PDB structure</b> | <b>0.013</b>       | <b>0.099</b>      | <sup>5</sup> |

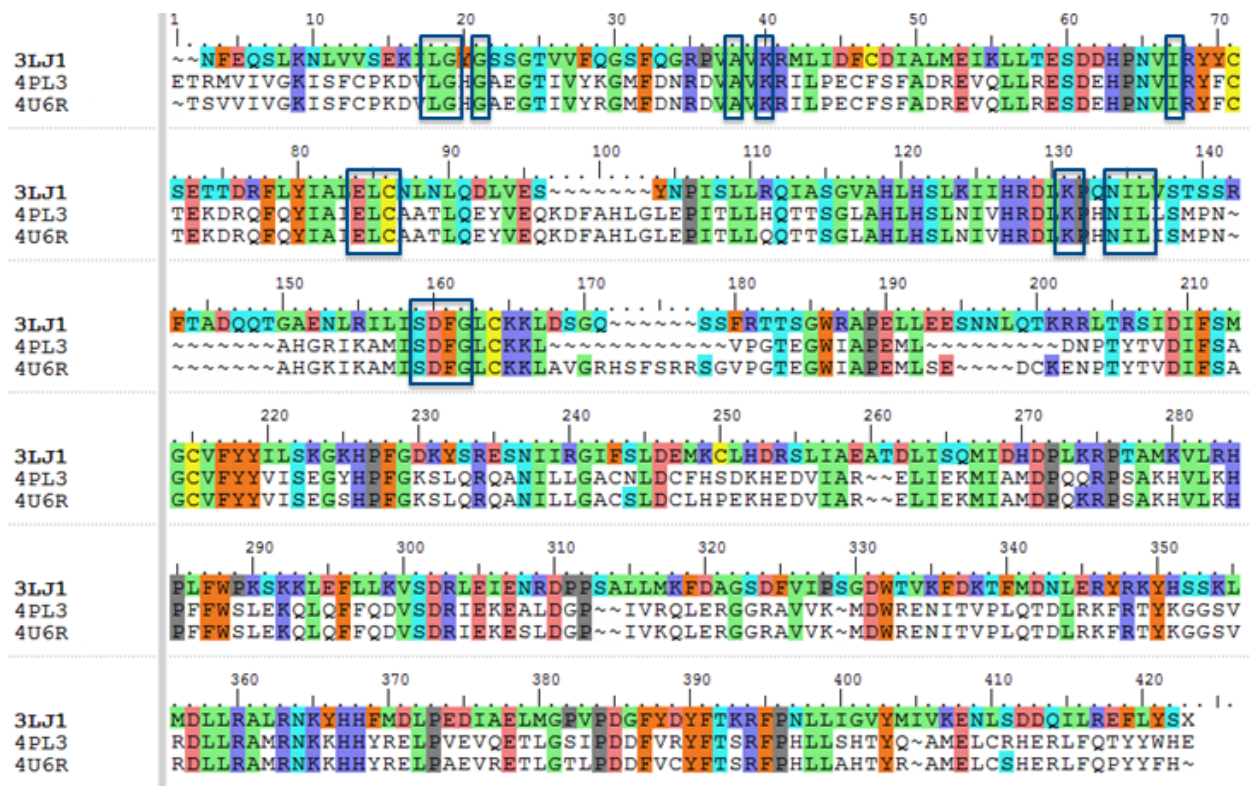

**Figure S1.** Sequence alignment of IRE1 cytosolic domain in different organism; yeast structure (PDB code: 3LJ1), murine (PDB code: 4PL3), and human (PDB code: 4U6R) using Bioluminate<sup>2</sup> in Schrödinger<sup>3</sup>. Identical residues are matched by same colour. Identical residues in the kinase active site, within a distance of 5.0 Å from the co-crystallized ligands, are highlighted using blue boxes.





```

*****:*****
Aotus nancymaae HTYRAMELCSHERLFQPYFHEPLQPQPPVTPGAL 431
Pongo abelii HTYQAMELCSHERLFQPYFHEPPEPQPPVTPDAL 431
Homo sapiens HTYRAMELCSHERLFQPYFHEPPEPQPPVTPDAL 455
Papio anubis HTYRAMELCSHERLFQPYFHRPPEPQPPVTPDAL 431
Ptilinopus t. HTYRAMELCSHERLFQPYFHRPPEPQPPVTPDAL 431
Ictidomys t. HTYRAMELCSHERLFQPYFHEPLEPQPPVTPDAL 444
Felis catus HTYRAMEPCSHERLFQPYFHEPPELRPPVTPDAL 444
Canis lupus f. HTYRAMEPCSHERLFQPYFHEPPDTRPPVTPDTL 428
**:* ***:**:*

```

**Figure S2.** A multiple sequence alignment of IRE1 cytosolic domain in 8 different organism using Clustal<sup>4</sup>. Residues are coloured as follow: AVFPMILW are shown in red, DE are blue, RHK are magenta, STYHCNGQ are green.

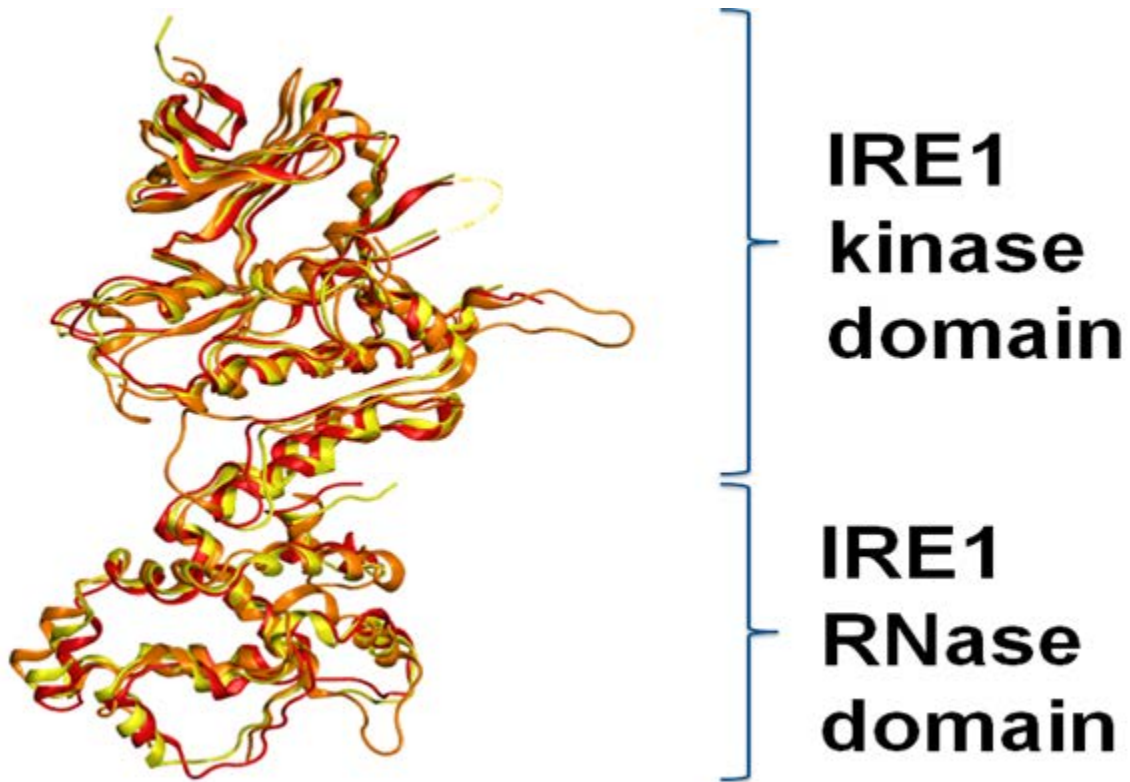

**Figure S3.** Superposition of the 3D structures of IRE1 in different organism; yeast structure in orange (PDB code: 2RIO), murine in yellow (PDB code: 4PL3), and human in red (PDB code: 5HGI).

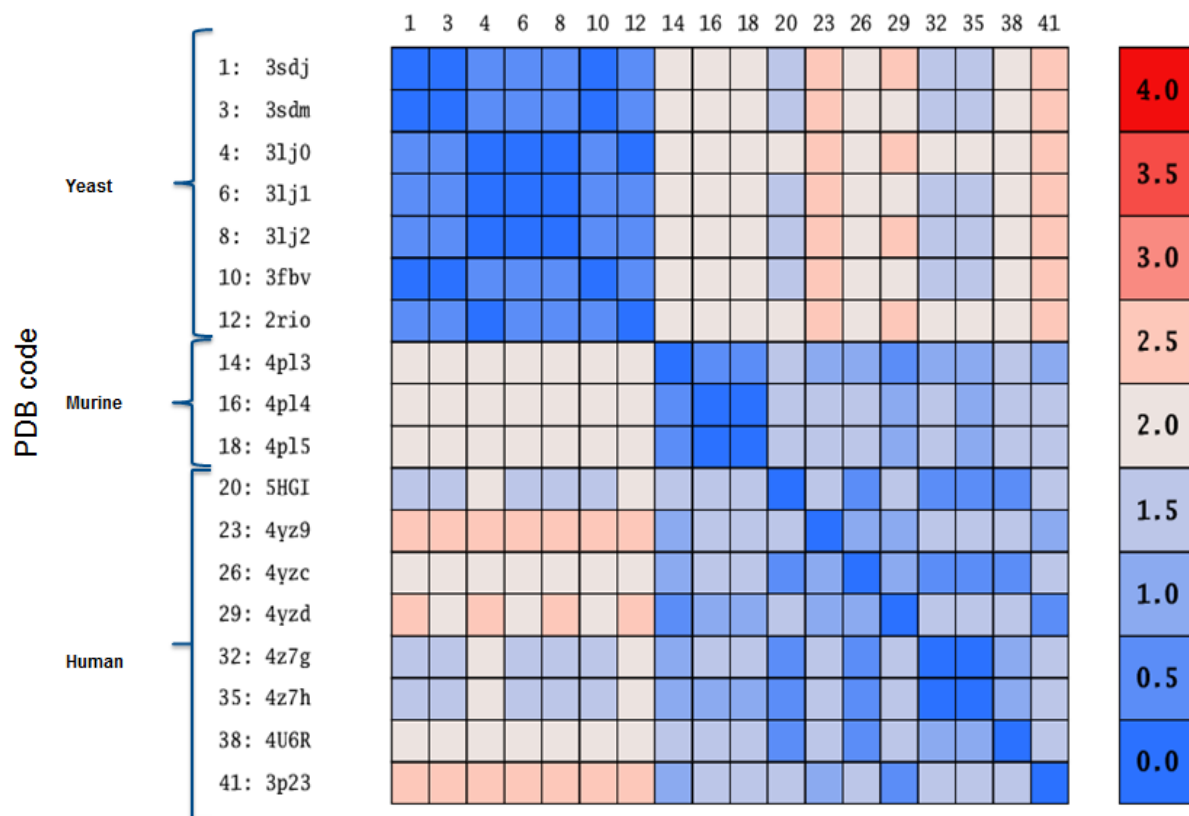

**Figure S4.** Root-mean-square deviation (RMSD) matrix values in Å of the positions of the C $\alpha$  atoms for each pair of IRE1 cytosolic domain structures. The RMSD values are represented by a colorimetric scale, going from blue (0) to red (4.0).

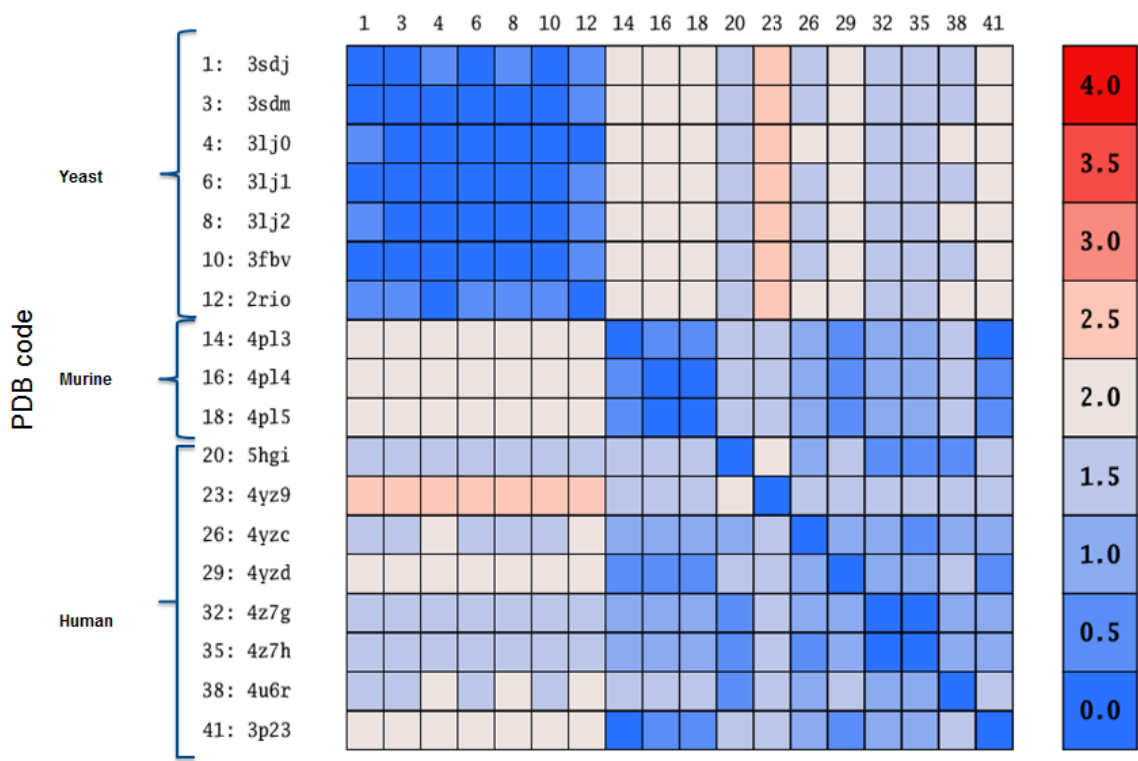

**Figure S5.** Root-mean-square deviation (RMSD) matrix values in Å of the positions of the C $\alpha$  atoms for each pair of IRE1 kinase active site domain structures. The RMSD values are represented by a colorimetric scale, going from blue (0) to red (4.0).

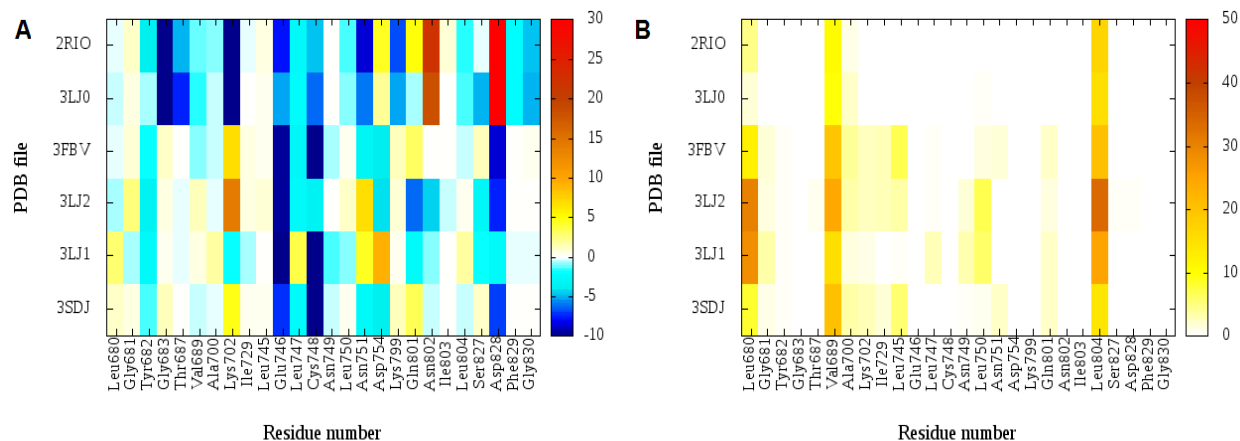

**Figure S6.** Per amino-acid interaction energy map for co-crystallized compounds inside the yeast IRE1 kinase binding site.

2RIO, 3LJ0: Endogenous ligands (ADP) co-crystallized on it;

3FBV, 3LJ2, 3LJ1 and 3SDJ: Exogenous ligands co-crystallized on it;

(A) Electrostatic energy values ( $\text{kcal mol}^{-1}$ ). (B) Hydrophobic score (arbitrary units)

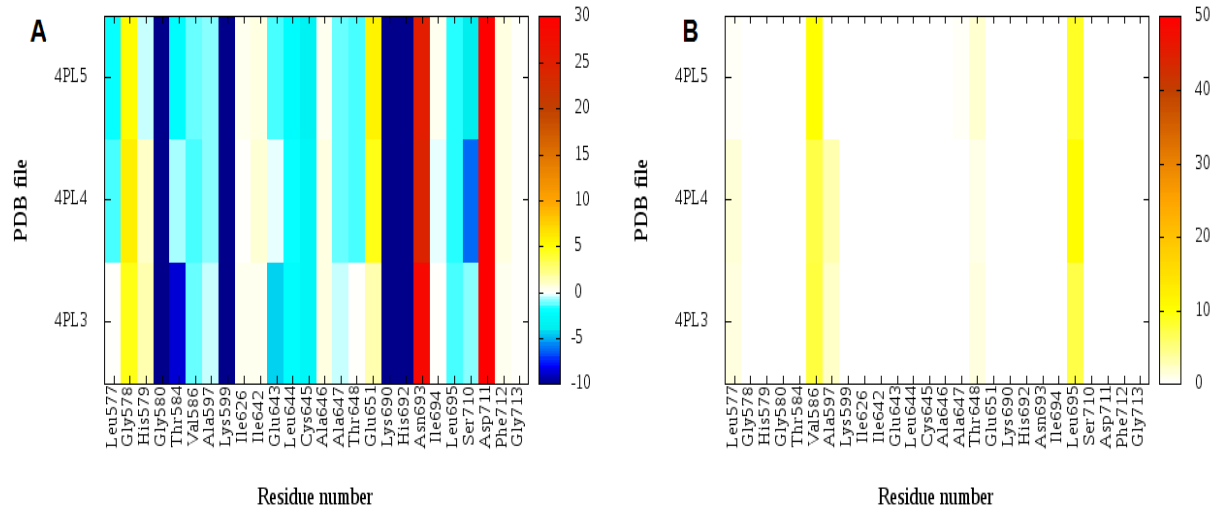

**Figure S7.** Per amino-acid interaction energy map for co-crystallized compounds inside the murine IRE1 kinase binding site.

A, B: Endogenous ligands (ADP)

(A) Electrostatic energy values ( $\text{kcal mol}^{-1}$ ). (B) Hydrophobic score (arbitrary units)

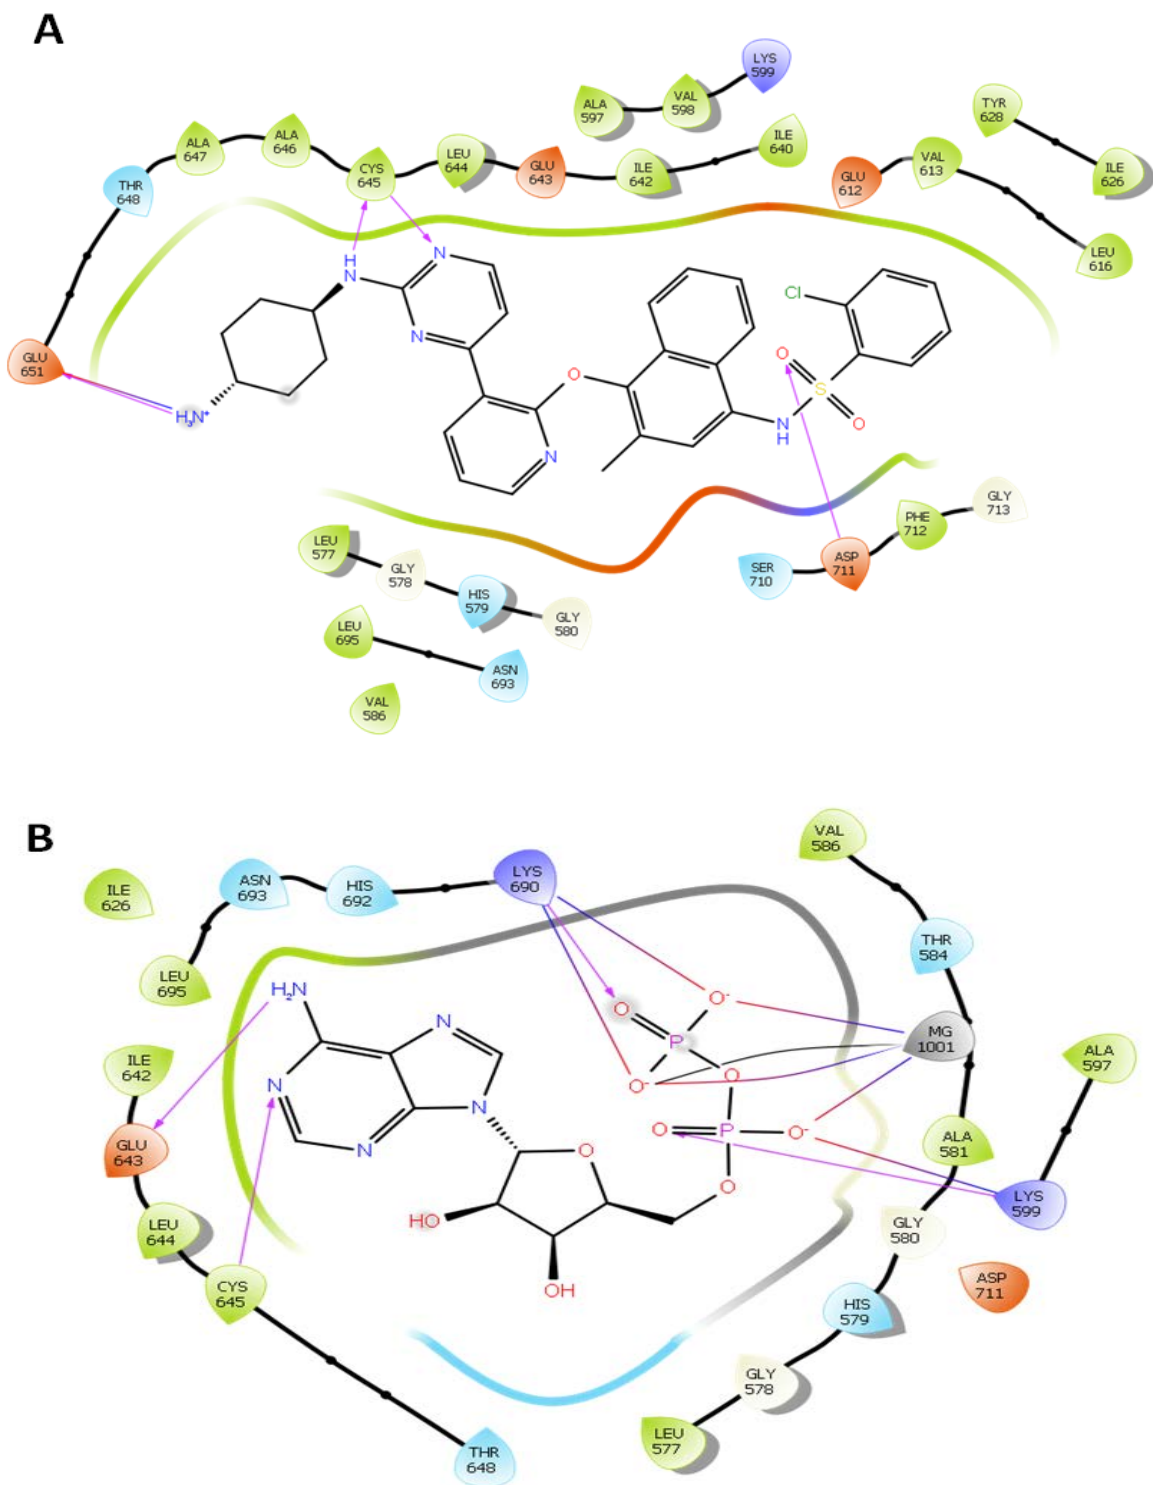

**Figure S8.** Schematic representation of the ligand interactions of (A) KIRA (PDB code: 4U6R) and (B) ADP (endogenous ligand) (PDB code: 3P23).



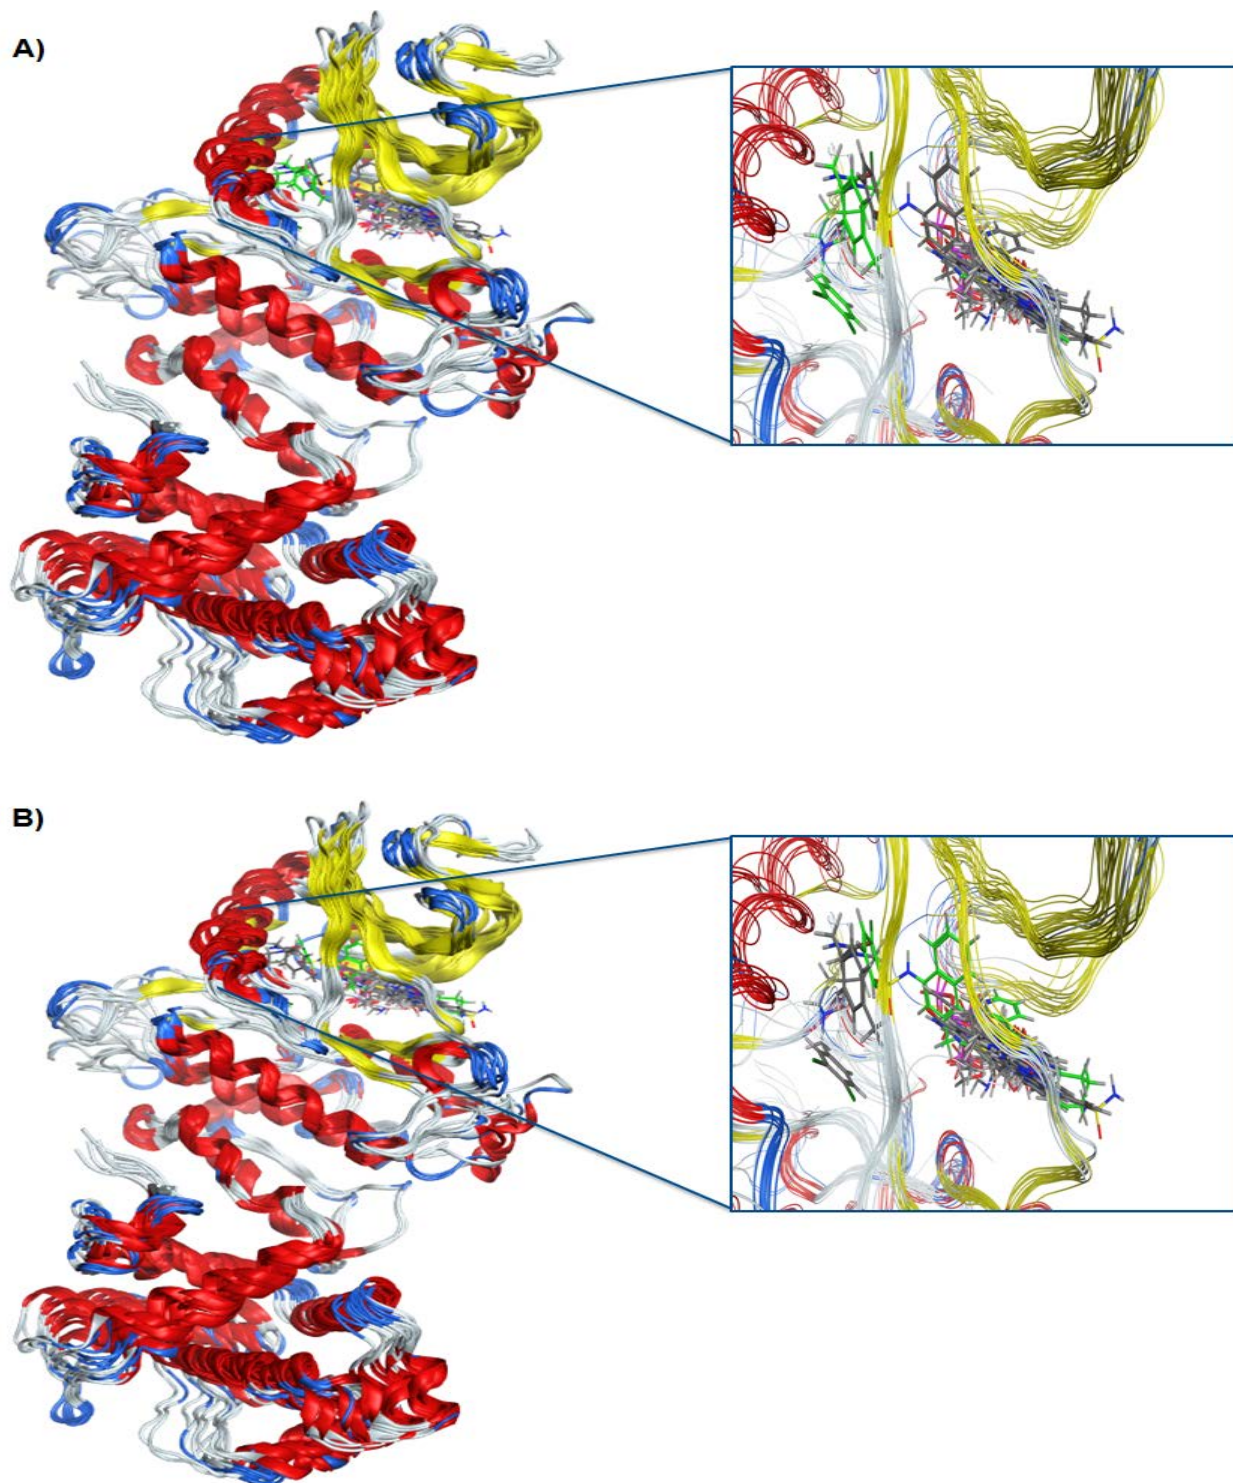

**Figure S9.** Superposition of all available 3D structures of IRE1 in different organism. Co-crystallized ligands are highlighted through stick representation: (A) Ligand co-crystallized in 4YZ9 PDB structure is coloured green, (B) Ligand co-crystallized in 4U6R PDB structure is coloured green.

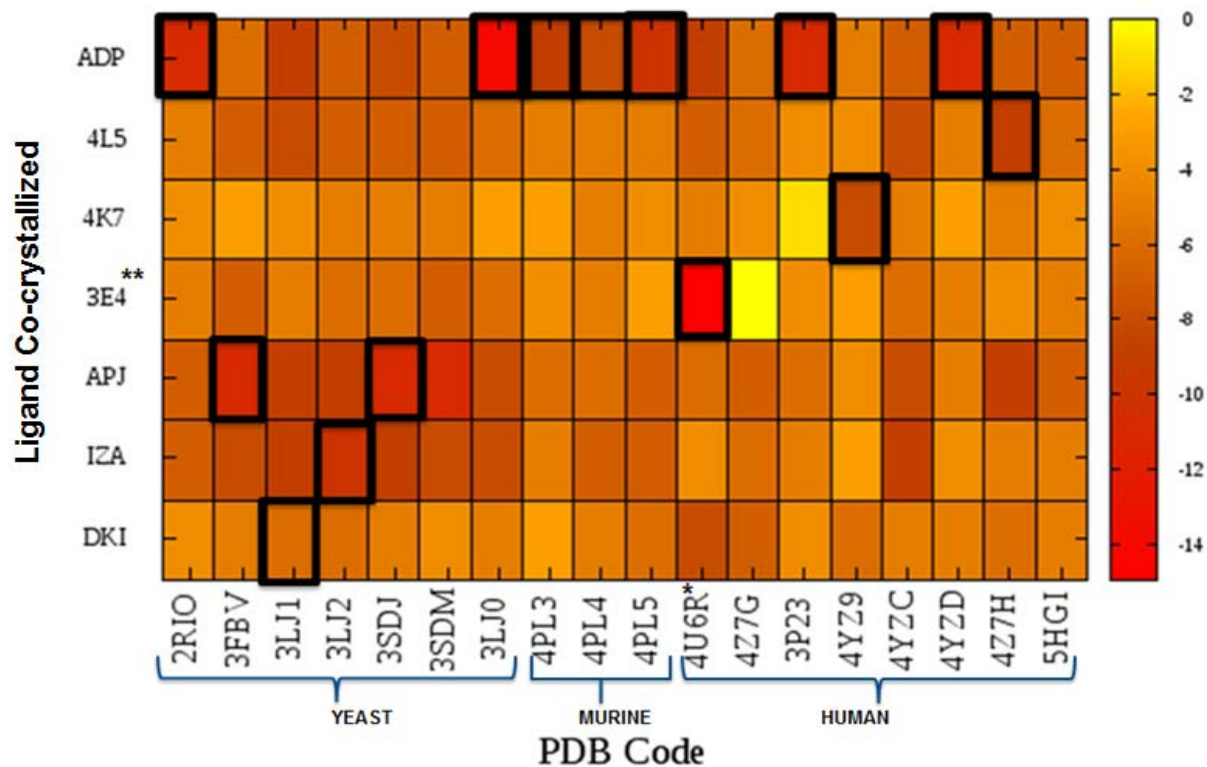

**Figure S10.** The Docking Score values returned by each co-crystallized ligand (y-values) for each IRE1 PDB structure (x-values) are represented by a colorimetric scale, going from red (-15) to yellow (0) indicative of Docking score value. Co-crystallized ligands highlighted with boxes for each IRE1 structure. \*Dephosphorylated IRE1 $\alpha$  co-crystallized with KIRA<sup>1</sup>. \*\*KIRA co-crystallized in 4U6R PDB structure.

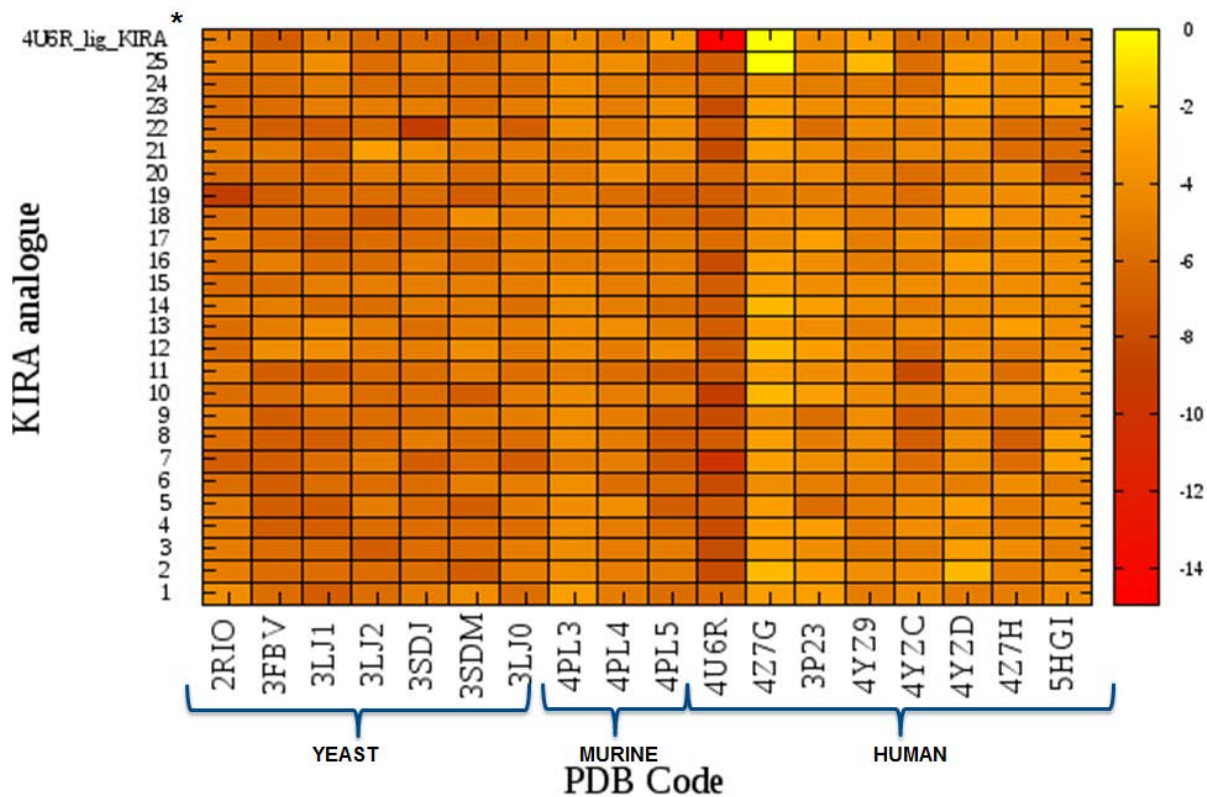

**Figure S11.** The Docking Score of each KIRA analogues (y-values 1-25) for each IRE1 PDB structures (x-values) are represented by a colorimetric scale, going from red (-15) to yellow (0) indicative of Docking score value. \*KIRA co-crystallized in 4U6R PDB structure.

## Bibliography

- (1) Feldman, H. C.; Tong, M.; Wang, L.; Meza-Acevedo, R.; Gobillot, T. A.; Lebedev, I.; Gliedt, M. J.; Hari, S. B.; Mitra, A. K.; Backes, B. J.; et al. Structural and Functional Analysis of the Allosteric Inhibition of IRE1 $\alpha$  with ATP-Competitive Ligands. *ACS Chem. Biol.* **2016**, *11* (8), 2195–2205.
- (2) Schrödinger Release 2015-4: BioLuminate, Schrödinger, LLC, New York, NY, 2015.
- (3) Schrödinger Release 2015-4: Maestro, Schrödinger, LLC, New York, NY 2015.
- (4) Chenna, R.; Sugawara, H.; Koike, T.; Lopez, R.; Gibson, T. J.; Higgins, D. G.; Thompson, J. D. Multiple Sequence Alignment with the Clustal Series of Programs. *Nucleic Acids Res.* **2003**, *31* (13), 3497–3500.
- (5) Harrington, P. E.; Biswas, K.; Malwitz, D.; Tasker, A. S.; Mohr, C.; Andrews, K. L.; Dellamaggiore, K.; Kendall, R.; Beckmann, H.; Jaeckel, P.; et al. Unfolded Protein Response in Cancer: IRE1 $\alpha$  Inhibition by Selective Kinase Ligands Does Not Impair Tumor Cell Viability. *ACS Med. Chem. Lett.* **2015**, *6* (1), 68–72.
